# Supplementary material for: Predicting Final PCDD/F Emissions by Coupling Adsorption Model of Activated Carbon and Relationships of PCDD/Fs and Flue Gas Compositions
Source: MDPI journal article supplement (doi:10.3390/pr11041158), 2023-04-10
Supplement: s1 [file s1]

## **Supplementary Material**

### **Predicting final PCDD/Fs emissions by coupling the adsorption model of activated carbon and the relationships of PCDD/Fs and flue gas**

Jianjun Cai, Lingxia Zhu, Da Huang, Ming Luo, Xingying Tang, Wangqi Liu

**Figure S1** One-phase exponential decay function.

**Figure S2** The concentration of O<sub>2</sub> at the stack inlet.

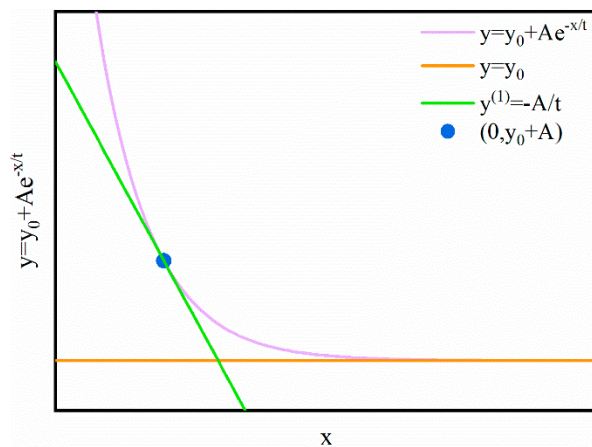

**Figure S1** One-phase exponential decay function

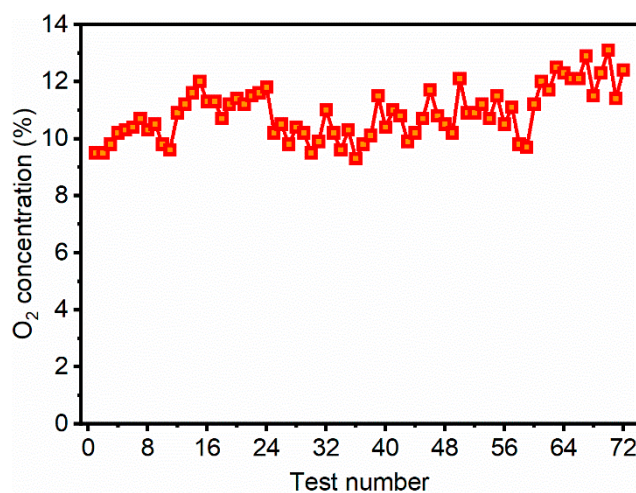

**Figure S2** The concentration of  $O_2$  at the stack inlet
